# Supplementary material for: Contexte historique général du Bas-Empire romain
Source: PLOS journal article supplement (doi:10.1371/journal.pcbi.1002400), 2010-04-07
Supplement: S2 (10.1371/journal.pcbi.1002400.s002) [file journal.pcbi.1002400.s002]

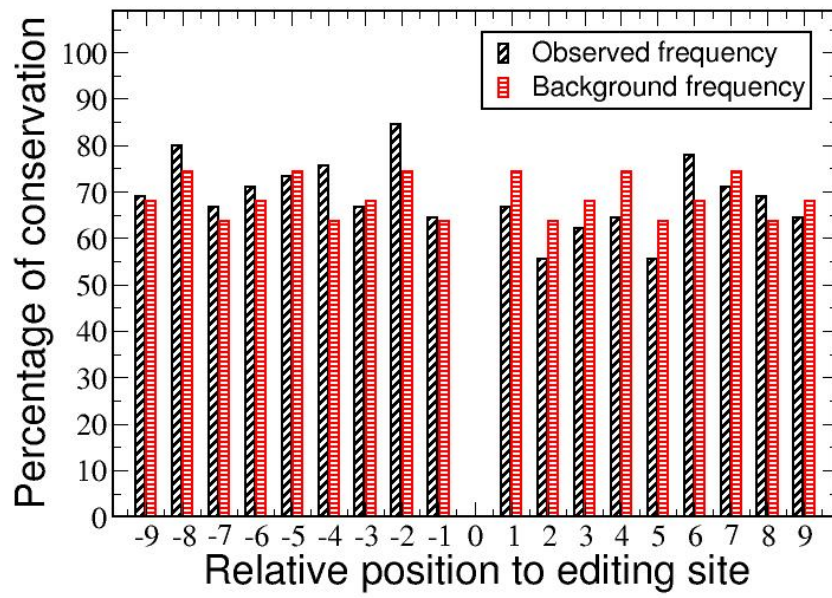

(a)

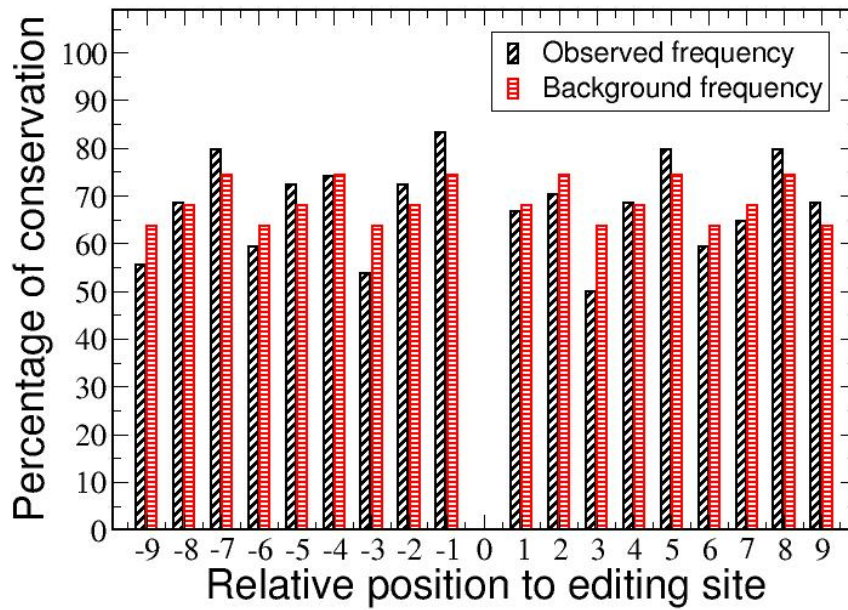

(b)

**Figure S2** Comparison of observed and expected conservation for the 8 less conserved genes for editing sites at the (a) first and (b) third codon position.
