# Supplementary material for: Contexte historique général du Bas-Empire romain
Source: PLOS journal article supplement (doi:10.1371/journal.pcbi.1002400), 2010-04-07
Supplement: S3 (10.1371/journal.pcbi.1002400.s003) [file journal.pcbi.1002400.s003]

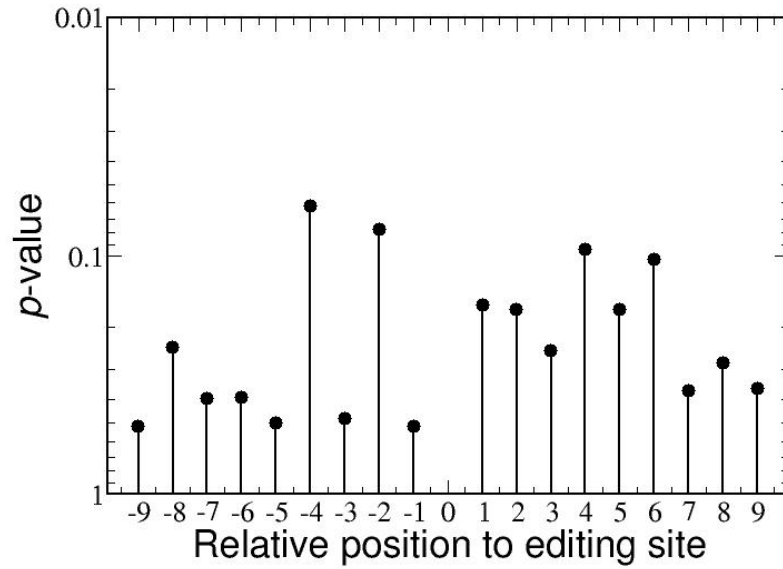

(a)

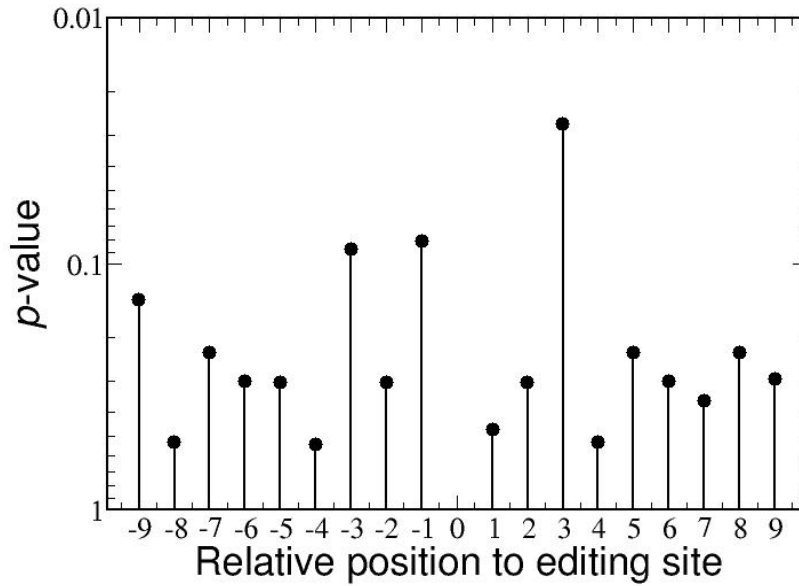

(b)

**Figure S3** *p*-values for the differences between the observed and the background conservation for shared editing sites in the 8 less conserved genes at the (a) first and (b) third codon position. The threshold for statistical significance ( $0.05/20=0.0025$  as the *p*-value cut off) is not indicated in the figure since it would be beyond the top edge of the graph.
