# Supplementary material for: Contexte historique général du Bas-Empire romain
Source: PLOS journal article supplement (doi:10.1371/journal.pcbi.1002400), 2010-04-07
Supplement: S4 (10.1371/journal.pcbi.1002400.s004) [file journal.pcbi.1002400.s004]

| Gene  | Conservation at the second codon position (%) | Major groups ("All" or "More conserved" or "Less conserved") | Four groups for codon bias<br>1: 90%-100%<br>2: 80%-90%<br>3: 70%-80%<br>4: 60%-70% | Two groups for codon bias<br>1: 80%-100%<br>2: 60%-80% |
|-------|-----------------------------------------------|--------------------------------------------------------------|-------------------------------------------------------------------------------------|--------------------------------------------------------|
| atp1  | 86.0                                          | More conserved                                               | 2                                                                                   | 1                                                      |
| atp6  | 86.1                                          | More conserved                                               | 2                                                                                   | 1                                                      |
| atp8  | 73.4                                          | Less conserved*                                              | 3                                                                                   | 2                                                      |
| atp9  | 81.8                                          | Less conserved                                               | 2                                                                                   | 1                                                      |
| cox1  | 92.7                                          | More conserved                                               | 1                                                                                   | 1                                                      |
| cox2  | 97.0                                          | More conserved                                               | 1                                                                                   | 1                                                      |
| cytb  | 96.2                                          | More conserved                                               | 1                                                                                   | 1                                                      |
| nad4L | 91.7                                          | More conserved                                               | 1                                                                                   | 1                                                      |
| nad6  | 86.3                                          | More conserved                                               | 2                                                                                   | 1                                                      |
| nad7  | 91.7                                          | More conserved                                               | 1                                                                                   | 1                                                      |
| rpL2  | 77.3                                          | Less conserved                                               | 3                                                                                   | 2                                                      |
| rpL16 | 76.9                                          | Less conserved                                               | 3                                                                                   | 2                                                      |
| rpS3  | 71.9                                          | Less conserved                                               | 3                                                                                   | 2                                                      |
| rpS7  | 60.9                                          | Less conserved                                               | 4                                                                                   | 2                                                      |
| rpS12 | 82.8                                          | Less conserved                                               | 2                                                                                   | 1                                                      |
| rpS19 | 78.0                                          | Less conserved                                               | 3                                                                                   | 2                                                      |

**Table S1** Conservation at the second position and group division for the 16 known genes. The group division depends on the conservation at the second codon position. Genes with a background frequency at the 2nd codon position less of than 85.0% are assigned to the "less conserved" group while the other genes are assigned to the "more conserved" group. For the codon bias analysis a more fine grained division into four groups is also used.

\* Since we could not create a *Physarum* based PSSM for atp8, we excluded it in the RNA editing site prediction.
