# Supplementary material for: Contexte historique général du Bas-Empire romain
Source: PLOS journal article supplement (doi:10.1371/journal.pcbi.1002400), 2010-04-07
Supplement: S6 (10.1371/journal.pcbi.1002400.s006) [file journal.pcbi.1002400.s006]

| Gene  | Accession number for<br><i>Physarum</i> -mRNA |
|-------|-----------------------------------------------|
| cox3  | AF084527                                      |
| nad1  | HQ849404                                      |
| nad2  | DQ092490                                      |
| nad3  | HQ849405                                      |
| nad4  | HQ849406                                      |
| nad5  | HQ849407                                      |
| rpS4  | HQ849426                                      |
| rpS11 | HQ849418                                      |

**Table S3** Accession numbers for the eight *Physarum* genes which were also identified in *Didymium*.
