# Supplementary material for: Contexte historique général du Bas-Empire romain
Source: PLOS journal article supplement (doi:10.1371/journal.pcbi.1002400), 2010-04-07
Supplement: S8 (10.1371/journal.pcbi.1002400.s008) [file journal.pcbi.1002400.s008]

| Relative Position to editing site | Editing site as the <b>first</b> codon position | Editing site as the <b>second</b> codon position | Editing site as the <b>third</b> codon position |
|-----------------------------------|-------------------------------------------------|--------------------------------------------------|-------------------------------------------------|
| -9                                | 1                                               | 2                                                | 3                                               |
| -8                                | 2                                               | 3                                                | 1                                               |
| -7                                | 3                                               | 1                                                | 2                                               |
| -6                                | 1                                               | 2                                                | 3                                               |
| -5                                | 2                                               | 3                                                | 1                                               |
| -4                                | 3                                               | 1                                                | 2                                               |
| -3                                | 1                                               | 2                                                | 3                                               |
| -2                                | 2                                               | 3                                                | 1                                               |
| -1                                | 3                                               | 1                                                | 2                                               |
| <b>0</b>                          | <b>1</b>                                        | <b>2</b>                                         | <b>3</b>                                        |
| 1                                 | 2                                               | 3                                                | 1                                               |
| 2                                 | 3                                               | 1                                                | 2                                               |
| 3                                 | 1                                               | 2                                                | 3                                               |
| 4                                 | 2                                               | 3                                                | 1                                               |
| 5                                 | 3                                               | 1                                                | 2                                               |
| 6                                 | 1                                               | 2                                                | 3                                               |
| 7                                 | 2                                               | 3                                                | 1                                               |
| 8                                 | 3                                               | 1                                                | 2                                               |
| 9                                 | 1                                               | 2                                                | 3                                               |

**Table S5** Relationships between codon positions of editing sites and the vicinity of editing sites. The numbers 1, 2, and 3 represent the codon position for corresponding site.
